# Supplementary material for: The first continuous silver polyhedra framework containing four kinds of coordination spheres
Source: Royal Society of Chemistry journal article supplement (doi:10.1039/b819705a), 2009-01-01
Supplement: b819705a.pdf [file b819705a.pdf]

Electronic Supplementary Information (ESI)

## The first continuous silver polyhedra framework containing four kinds of coordination spheres

Zhao-Peng Deng, Zhi-Biao Zhu, Shan Gao<sup>\*</sup>, Li-Hua Huo and Hui Zhao

**Figure S1.** Photoluminescence spectra of **HL** at room temperature.

**Figure S2.** IR spectra of **HLJU-1**

**Figure S3.** TG curve of **HLJU-1**

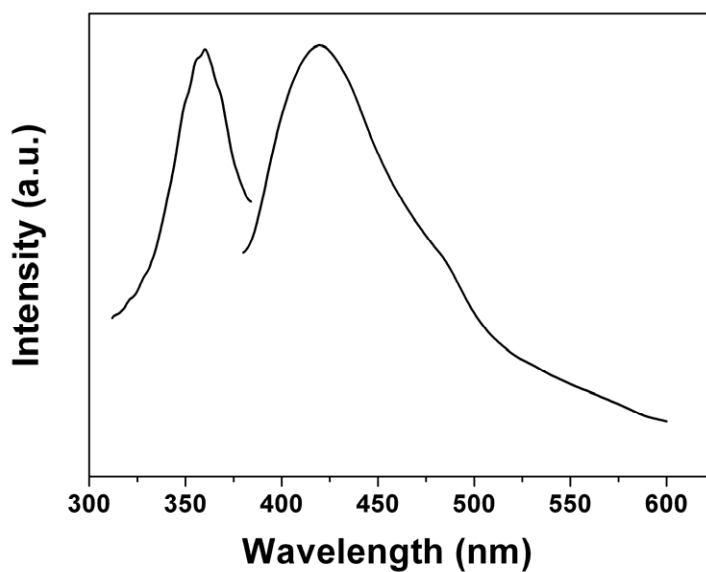

**Figure S1.** Photoluminescence spectra of **HL** at room temperature.

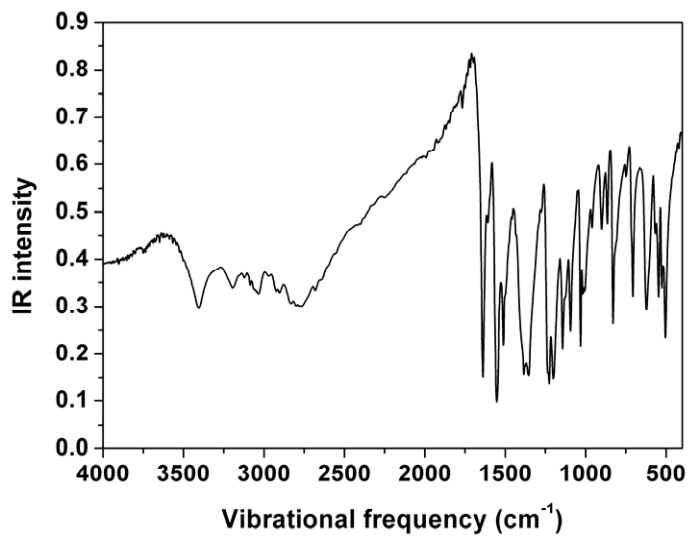

Figure S2. IR spectra of HLJU-1.

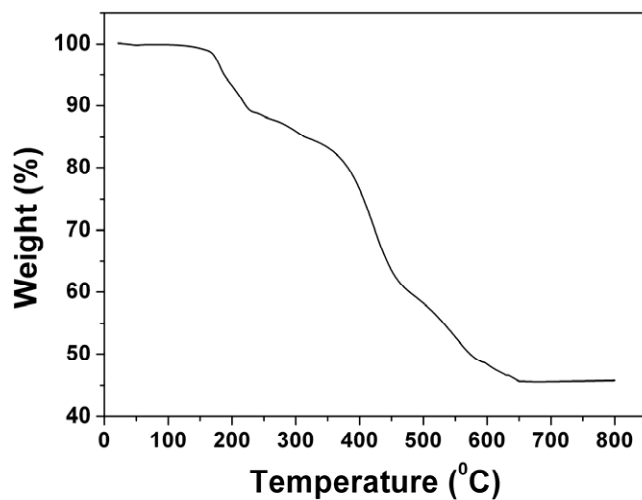

Figure S3. TG curve of HLJU-1.

### TG analysis.

The TGA curve of HLJU-1 shows two main steps of weight losses. The first step completes at 247 °C, which corresponds to the release of aqua ligands and ligating nitrate ions. The observed weight loss of 11.54% is close to the calculated value (11.80%). Further decomposition occurred at 247–660 °C with the weight loss of 42.83% attributing to the loss of host component (calcd 43.40%).

Table S1 Selected bond distances (Å) and angles (°) for complex **HLJU-1**<sup>a</sup>

|                                                |            |                                              |            |
|------------------------------------------------|------------|----------------------------------------------|------------|
| Ag(1)-O(8)                                     | 2.338(3)   | Ag(3)-Ag(3) <sup>iii</sup>                   | 3.2748(8)  |
| Ag(1)-O(1) <sup>i</sup>                        | 2.428(4)   | Ag(4)-O(12) <sup>iv</sup>                    | 2.354(3)   |
| Ag(1)-O(1)                                     | 3.001(5)   | Ag(4)-O(14)                                  | 2.519(4)   |
| Ag(1)-O(2)                                     | 2.526(4)   | Ag(4)-O(16)                                  | 2.540(5)   |
| Ag(1)-O(9) <sup>ii</sup>                       | 2.960(5)   | Ag(4)-O(9)                                   | 2.577(3)   |
| Ag(1)-O(17) <sup>ii</sup>                      | 2.544(4)   | Ag(4)-O(10)                                  | 2.858(5)   |
| Ag(1)-O(16) <sup>ii</sup>                      | 2.565(5)   | Ag(4)-O(13)                                  | 2.596(4)   |
| Ag(2)-O(1)                                     | 2.651(3)   | Ag(4)-O(2) <sup>v</sup>                      | 2.672(4)   |
| Ag(2)-O(4)                                     | 2.425(3)   | Ag(4)-Ag(5)                                  | 3.3802(8)  |
| Ag(2)-O(6)                                     | 2.632(3)   | Ag(5)-O(9)                                   | 2.552(3)   |
| Ag(2)-O(8)                                     | 2.436(3)   | Ag(5)-O(5) <sup>v</sup>                      | 2.568(3)   |
| Ag(2)-O(15)                                    | 2.452(4)   | Ag(5)-O(12)                                  | 2.582(3)   |
| Ag(2)-O(1W)                                    | 2.462(5)   | Ag(5)-O(12) <sup>iv</sup>                    | 2.588(3)   |
| Ag(3)-O(6) <sup>iii</sup>                      | 2.300(3)   | Ag(5)-O(10) <sup>iv</sup>                    | 2.588(4)   |
| Ag(3)-O(5)                                     | 2.396(3)   | Ag(5)-O(2) <sup>v</sup>                      | 2.624(4)   |
| Ag(3)-O(10) <sup>iii</sup>                     | 2.430(3)   | Ag(5)-O(4) <sup>v</sup>                      | 2.651(4)   |
| Ag(3)-O(14) <sup>iii</sup>                     | 2.670(3)   | Ag(5)-O(8) <sup>v</sup>                      | 2.836(3)   |
| Ag(3)-O(4)                                     | 2.465(3)   |                                              |            |
| O(8)-Ag(1)-O(1) <sup>i</sup>                   | 116.18(13) | O(12) <sup>iv</sup> -Ag(4)-O(14)             | 122.58(12) |
| O(8)-Ag(1)-O(2)                                | 85.30(12)  | O(12) <sup>iv</sup> -Ag(4)-O(16)             | 148.15(13) |
| O(1) <sup>i</sup> -Ag(1)-O(2)                  | 127.03(13) | O(14)-Ag(4)-O(16)                            | 89.24(14)  |
| O(8)-Ag(1)-O(17) <sup>ii</sup>                 | 123.29(12) | O(12) <sup>iv</sup> -Ag(4)-O(9)              | 91.00(11)  |
| O(1) <sup>i</sup> -Ag(1)-O(17) <sup>ii</sup>   | 90.38(14)  | O(14)-Ag(4)-O(9)                             | 108.87(11) |
| O(2)-Ag(1)-O(17) <sup>ii</sup>                 | 118.60(12) | O(16)-Ag(4)-O(9)                             | 75.67(12)  |
| O(8)-Ag(1)-O(16) <sup>ii</sup>                 | 137.70(13) | O(12) <sup>iv</sup> -Ag(4)-O(13)             | 107.58(12) |
| O(1) <sup>i</sup> -Ag(1)-O(16) <sup>ii</sup>   | 105.96(14) | O(14)-Ag(4)-O(13)                            | 49.88(11)  |
| O(2)-Ag(1)-O(16) <sup>ii</sup>                 | 71.79(12)  | O(16)-Ag(4)-O(13)                            | 93.75(14)  |
| O(1)-Ag(1)-O(2)                                | 50.35(12)  | O(2) <sup>v</sup> -Ag(4)-O(14)               | 157.61(15) |
| O(1)-Ag(1)-O(8)                                | 81.85(12)  | O(2) <sup>v</sup> -Ag(4)-O(16)               | 69.82(15)  |
| O(1)-Ag(1)-O(9) <sup>ii</sup>                  | 115.76(12) | O(9)-Ag(4)-O(2) <sup>v</sup>                 | 74.44(13)  |
| O(1)-Ag(1)-O(16) <sup>ii</sup>                 | 107.31(12) | O(9)-Ag(4)-O(13)                             | 157.11(11) |
| O(1)-Ag(1)-O(17) <sup>ii</sup>                 | 153.79(12) | O(10)-Ag(4)-O(9)                             | 52.17(11)  |
| O(1)-Ag(1)-O(1) <sup>i</sup>                   | 83.59(12)  | O(14)-Ag(4)-O(10)                            | 72.85(11)  |
| O(2)-Ag(1)-O(9) <sup>ii</sup>                  | 70.23(12)  | O(10)-Ag(4)-O(13)                            | 116.88(12) |
| O(9) <sup>ii</sup> -Ag(1)-O(1) <sup>i</sup>    | 160.64(13) | O(10)-Ag(4)-O(16)                            | 111.60(12) |
| O(9) <sup>ii</sup> -Ag(1)-O(16) <sup>ii</sup>  | 68.79(14)  | O(12) <sup>iv</sup> -Ag(4)-O(10)             | 79.95(11)  |
| O(9) <sup>ii</sup> -Ag(1)-O(17) <sup>ii</sup>  | 71.86(14)  | O(2) <sup>v</sup> -Ag(4)-O(10)               | 121.49(12) |
| O(8)-Ag(1)-O(9) <sup>ii</sup>                  | 70.13(12)  | O(2) <sup>v</sup> -Ag(5)-O(12)               | 146.95(12) |
| O(17) <sup>ii</sup> -Ag(1)-O(16) <sup>ii</sup> | 50.04(12)  | O(2) <sup>v</sup> -Ag(5)-O(10) <sup>iv</sup> | 117.72(12) |
| O(1)-Ag(2)-O(1W)                               | 105.91(15) | O(2) <sup>v</sup> -Ag(5)-O(12) <sup>iv</sup> | 75.74(13)  |
| O(1)-Ag(2)-O(4)                                | 75.33(13)  | O(2) <sup>v</sup> -Ag(5)-O(5) <sup>v</sup>   | 133.85(13) |
| O(1)-Ag(2)-O(6)                                | 164.36(12) | O(2) <sup>v</sup> -Ag(5)-O(4) <sup>v</sup>   | 71.56(12)  |
| O(1)-Ag(2)-O(8)                                | 87.87(13)  | O(2) <sup>v</sup> -Ag(5)-O(8) <sup>v</sup>   | 74.23(12)  |
| O(1)-Ag(2)-O(15)                               | 84.60(15)  | O(2) <sup>v</sup> -Ag(5)-O(9)                | 75.66(13)  |
| O(4)-Ag(2)-O(8)                                | 95.50(12)  | O(4) <sup>v</sup> -Ag(5)-O(9)                | 141.29(12) |
| O(4)-Ag(2)-O(15)                               | 79.75(12)  | O(4) <sup>v</sup> -Ag(5)-O(12)               | 140.85(11) |

|                                                  |            |                                                |            |
|--------------------------------------------------|------------|------------------------------------------------|------------|
| O(4)-Ag(2)-O(6)                                  | 99.50(12)  | O(4) <sup>v</sup> -Ag(5)-O(10) <sup>iv</sup>   | 67.44(12)  |
| O(8)-Ag(2)-O(6)                                  | 77.84(11)  | O(4) <sup>v</sup> -Ag(5)-O(12) <sup>iv</sup>   | 104.59(12) |
| O(8)-Ag(2)-O(15)                                 | 171.90(11) | O(4) <sup>v</sup> -Ag(5)-O(5) <sup>v</sup>     | 75.76(12)  |
| O(4)-Ag(2)-O(1W)                                 | 171.20(14) | O(4) <sup>v</sup> -Ag(5)-O(8) <sup>v</sup>     | 81.88(11)  |
| O(8)-Ag(2)-O(1W)                                 | 93.26(14)  | O(8) <sup>v</sup> -Ag(5)-O(9)                  | 69.66(11)  |
| O(15)-Ag(2)-O(1W)                                | 91.65(15)  | O(8) <sup>v</sup> -Ag(5)-O(12)                 | 110.16(10) |
| O(15)-Ag(2)-O(6)                                 | 109.29(13) | O(8) <sup>v</sup> -Ag(5)-O(10) <sup>iv</sup>   | 138.84(11) |
| O(6)-Ag(2)-O(1W)                                 | 81.51(13)  | O(8) <sup>v</sup> -Ag(5)-O(12) <sup>iv</sup>   | 145.32(12) |
| O(6) <sup>iii</sup> -Ag(3)-O(5)                  | 147.47(12) | O(8) <sup>v</sup> -Ag(5)-O(5) <sup>v</sup>     | 69.62(12)  |
| O(6) <sup>iii</sup> -Ag(3)-O(10) <sup>iii</sup>  | 122.65(12) | O(9)-Ag(5)-O(5) <sup>v</sup>                   | 115.59(10) |
| O(5)-Ag(3)-O(10) <sup>iii</sup>                  | 82.78(11)  | O(9)-Ag(5)-O(12)                               | 75.62(10)  |
| O(6) <sup>iii</sup> -Ag(3)-O(4)                  | 122.03(11) | O(5) <sup>v</sup> -Ag(5)-O(12)                 | 74.35(11)  |
| O(5)-Ag(3)-O(4)                                  | 82.50(11)  | O(9)-Ag(5)-O(12) <sup>iv</sup>                 | 86.44(10)  |
| O(5)-Ag(3)-O(14) <sup>iii</sup>                  | 79.50(14)  | O(5) <sup>v</sup> -Ag(5)-O(12) <sup>iv</sup>   | 145.04(10) |
| O(10) <sup>iii</sup> -Ag(3)-O(4)                 | 72.91(12)  | O(12)-Ag(5)-O(12) <sup>iv</sup>                | 86.49(11)  |
| O(14) <sup>iii</sup> -Ag(3)-O(4)                 | 147.11(11) | O(9)-Ag(5)-O(10) <sup>iv</sup>                 | 149.22(10) |
| O(6) <sup>iii</sup> -Ag(3)-O(14) <sup>iii</sup>  | 86.29(13)  | O(5) <sup>v</sup> -Ag(5)-O(10) <sup>iv</sup>   | 76.47(10)  |
| O(10) <sup>iii</sup> -Ag(3)-O(14) <sup>iii</sup> | 77.69(13)  | O(12)-Ag(5)-O(10) <sup>iv</sup>                | 81.36(11)  |
| O(2) <sup>v</sup> -Ag(4)-O(12) <sup>iv</sup>     | 78.82(14)  | O(12) <sup>iv</sup> -Ag(5)-O(10) <sup>iv</sup> | 71.86(10)  |
| O(2) <sup>v</sup> -Ag(4)-O(13)                   | 121.43(15) |                                                |            |

<sup>a</sup> Symmetry Code: i, -x+1,-y,-z; ii, x+1,y,z; iii, -x+1,-y+1,-z+1; iv, -x,-y+1,-z+1; v, x-1,y,z.
